# Supplementary material
Source: Springer Nature journal article supplement (https://www.springermedizin.de/resource/supplementary/12931_2010_1046_MOESM2_ESM.pdf/9425522)

**A**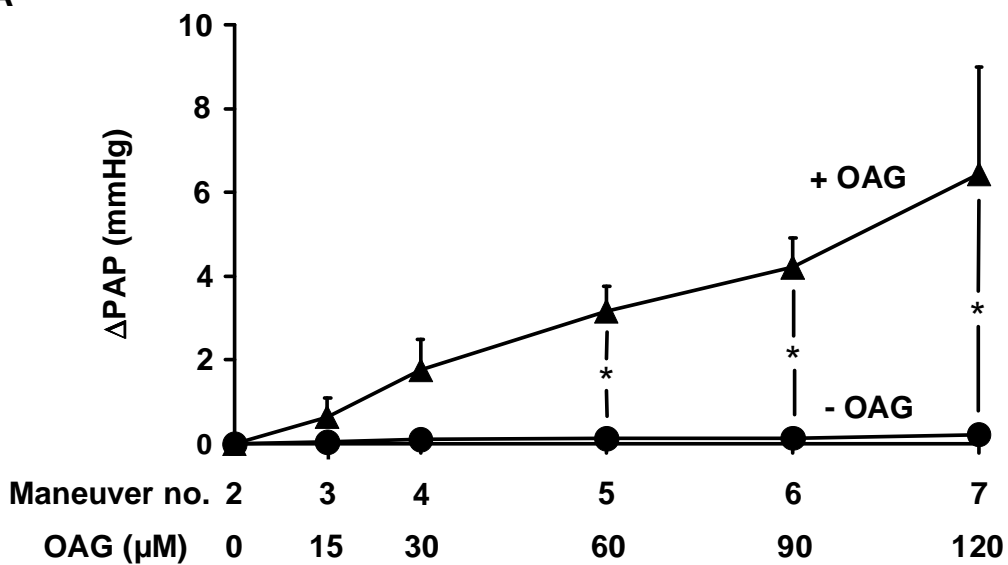**B**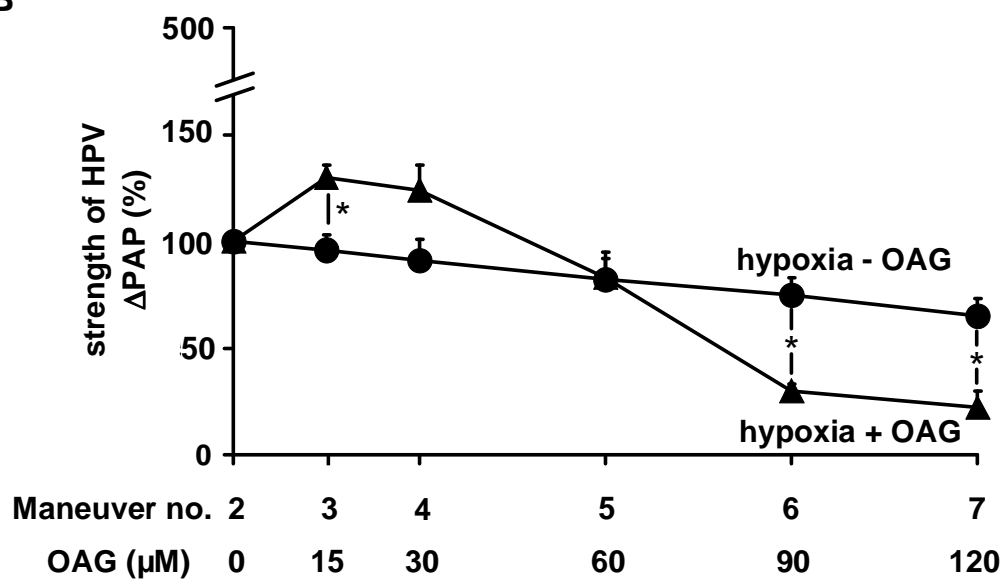**C**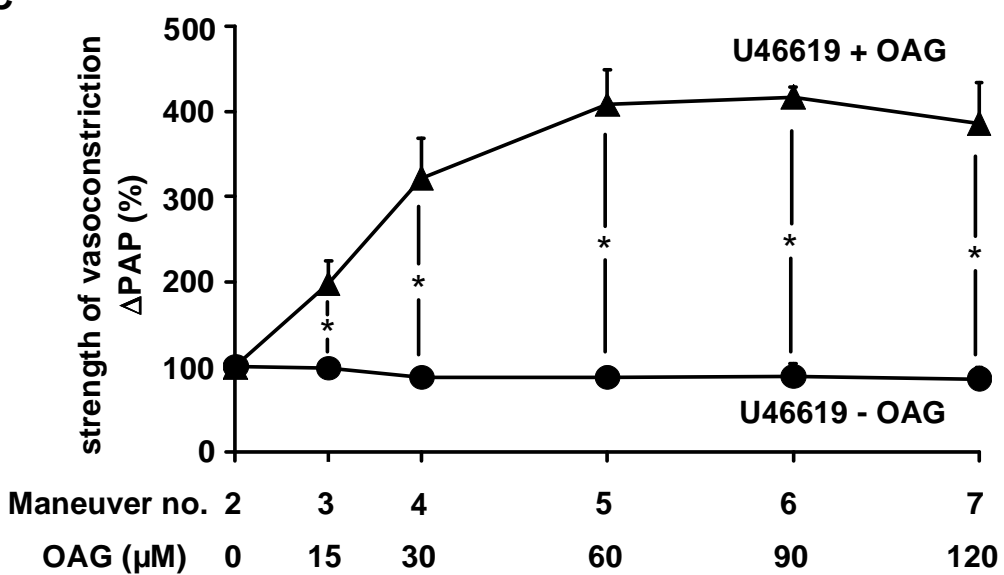

Supplement: MOESM2 [file 9425522]
